# Supplementary material for: Social Interactions as a Source of Information about E-Cigarettes: A Study of U.S. Adult Smokers
Source: MDPI journal article supplement (doi:10.3390/ijerph13080788), 2016-08-05
Supplement: s1 [file s1]

# Supplementary Materials: Social Interactions as a Source of Information about E-Cigarettes: A Study of U.S. Adult Smokers

Marissa G. Hall, Jessica K. Pepper, Jennifer C. Morgan and Noel T. Brewer

**Table S1.** Survey items.

| Construct                                     | Item                                                                                                               | Response Scale                                                         |
|-----------------------------------------------|--------------------------------------------------------------------------------------------------------------------|------------------------------------------------------------------------|
| Ever used e-cigarette                         | Have you ever used an e-cigarette or other vaping device, even one or two times?                                   | 0 = No<br>1 = Yes                                                      |
| Past month e-cigarette use                    | In the last 4 weeks, on how many days did you use an e-cigarette or other vaping device?                           | Number of days                                                         |
| Past week e-cigarette use                     | In the last week, on how many days did you use an e-cigarette or other vaping device?                              | Number of days                                                         |
| Frequency of conversations about e-cigarettes | In the last month, how many people did you talk to about e-cigarettes?                                             | 1 = No one<br>2 = 1–2 people<br>3 = 3–4 people<br>4 = 5 or more people |
| Conversation partners                         | In the last month, who did you talk to about e-cigarettes?—My spouse or significant other                          | 0 = No<br>1 = Yes                                                      |
| Conversation partners                         | In the last month, who did you talk to about e-cigarettes—My child                                                 | 0 = No<br>1 = Yes                                                      |
| Conversation partners                         | In the last month, who did you talk to about e-cigarettes—Other family member                                      | 0 = No<br>1 = Yes                                                      |
| Conversation partners                         | In the last month, who did you talk to about e-cigarettes—Friend                                                   | 0 = No<br>1 = Yes                                                      |
| Conversation partners                         | In the last month, who did you talk to about e-cigarettes—Co-worker                                                | 0 = No<br>1 = Yes                                                      |
| Conversation partners                         | In the last month, who did you talk to about e-cigarettes—Doctor or nurse                                          | 0 = No<br>1 = Yes                                                      |
| Conversation partners                         | In the last month, who did you talk to about e-cigarettes—Someone who sells e-cigarettes                           | 0 = No<br>1 = Yes                                                      |
| Conversation partners                         | In the last month, who did you talk to about e-cigarettes—A stranger                                               | 0 = No<br>1 = Yes                                                      |
| Conversation topics                           | In the last month, when discussing e-cigarettes, what did you talk about—What e-cigarettes are or how they work    | 0 = No<br>1 = Yes                                                      |
| Conversation topics                           | In the last month, when discussing e-cigarettes, what did you talk about—Using them to quit or cut back on smoking | 0 = No<br>1 = Yes                                                      |
| Conversation topics                           | In the last month, when discussing e-cigarettes, what did you talk about—Where to buy them or how much they cost   | 0 = No<br>1 = Yes                                                      |
| Conversation topics                           | In the last month, when discussing e-cigarettes, what did you talk about—Preferences for brand, type, or flavor    | 0 = No<br>1 = Yes                                                      |
| Conversation topics                           | In the last month, when discussing e-cigarettes, what did you talk about—How they affect your health               | 0 = No<br>1 = Yes                                                      |
| Conversation topics                           | In the last month, when discussing e-cigarettes, what did you talk about—Where I can use them                      | 0 = No<br>1 = Yes                                                      |
| Ever recommended e-cigarette                  | Have you ever recommended that someone use e-cigarettes?                                                           | 0 = No<br>1 = Yes                                                      |
| Who recommended to                            | Who did you recommend e-cigarettes to?—My spouse or significant other                                              | 0 = No<br>1 = Yes                                                      |
| Who recommended to                            | Who did you recommend e-cigarettes to?—My child                                                                    | 0 = No<br>1 = Yes                                                      |

|                    |                                                                                               |                   |
|--------------------|-----------------------------------------------------------------------------------------------|-------------------|
| Who recommended to | Who did you recommend e-cigarettes to?—Other family member                                    | 0 = No<br>1 = Yes |
| Who recommended to | Who did you recommend e-cigarettes to?—Friend                                                 | 0 = No<br>1 = Yes |
| Who recommended to | Who did you recommend e-cigarettes to?—Co-worker                                              | 0 = No<br>1 = Yes |
| Who recommended to | Who did you recommend e-cigarettes to?—A stranger                                             | 0 = No<br>1 = Yes |
| Why recommended    | Why did you recommend e-cigarettes to your spouse or significant other—To quit smoking        | 0 = No<br>1 = Yes |
| Why recommended    | Why did you recommend e-cigarettes to your spouse or significant other—To cut back on smoking | 0 = No<br>1 = Yes |
| Why recommended    | Why did you recommend e-cigarettes to your spouse or significant other—For health reasons     | 0 = No<br>1 = Yes |
| Why recommended    | Why did you recommend e-cigarettes to your spouse or significant other—For fun                | 0 = No<br>1 = Yes |
| Why recommended    | Why did you recommend e-cigarettes to your child?—To quit smoking                             | 0 = No<br>1 = Yes |
| Why recommended    | Why did you recommend e-cigarettes to your child?—To cut back on smoking                      | 0 = No<br>1 = Yes |
| Why recommended    | Why did you recommend e-cigarettes to your child?—For health reasons                          | 0 = No<br>1 = Yes |
| Why recommended    | Why did you recommend e-cigarettes to your child?—For fun                                     | 0 = No<br>1 = Yes |
| Why recommended    | Why did you recommend e-cigarettes to another family member—To quit smoking                   | 0 = No<br>1 = Yes |
| Why recommended    | Why did you recommend e-cigarettes to another family member—To cut back on smoking            | 0 = No<br>1 = Yes |
| Why recommended    | Why did you recommend e-cigarettes to another family member?—For health reasons               | 0 = No<br>1 = Yes |
| Why recommended    | Why did you recommend e-cigarettes to another family member?—For fun                          | 0 = No<br>1 = Yes |
| Why recommended    | Why did you recommend e-cigarettes to a friend?—To quit smoking                               | 0 = No<br>1 = Yes |
| Why recommended    | Why did you recommend e-cigarettes to a friend?—To cut back on smoking                        | 0 = No<br>1 = Yes |
| Why recommended    | Why did you recommend e-cigarettes to a friend?—For health reasons                            | 0 = No<br>1 = Yes |
| Why recommended    | Why did you recommend e-cigarettes to a friend?—For fun                                       | 0 = No<br>1 = Yes |
| Why recommended    | Why did you recommend e-cigarettes to a co-worker—To quit smoking                             | 0 = No<br>1 = Yes |
| Why recommended    | Why did you recommend e-cigarettes to a co-worker—To cut back on smoking                      | 0 = No<br>1 = Yes |
| Why recommended    | Why did you recommend e-cigarettes to a co-worker—For health reasons                          | 0 = No<br>1 = Yes |
| Why recommended    | Why did you recommend e-cigarettes to a co-worker—For fun                                     | 0 = No<br>1 = Yes |
| Why recommended    | Why did you recommend e-cigarettes to a stranger?—To quit smoking                             | 0 = No<br>1 = Yes |
| Why recommended    | Why did you recommend e-cigarettes to a stranger?—To cut back on smoking                      | 0 = No<br>1 = Yes |
| Why recommended    | Why did you recommend e-cigarettes to a stranger?—For health reasons                          | 0 = No<br>1 = Yes |
| Why recommended    | Why did you recommend e-cigarettes to a stranger?—For fun                                     | 0 = No<br>1 = Yes |

|                         |                                                                                                            |                                                                                                         |
|-------------------------|------------------------------------------------------------------------------------------------------------|---------------------------------------------------------------------------------------------------------|
| E-cigarette prototypes  | Picture a typical e-cigarette user your age. Is your opinion of this person...?                            | 1 = Very negative<br>2 = Somewhat negative<br>3 = Neutral<br>4 = Somewhat positive<br>5 = Very positive |
| Past month quit attempt | During the last 4 weeks, did you stop smoking for 1 day or longer because you were trying to quit smoking? | 0 = No<br>1 = Yes                                                                                       |

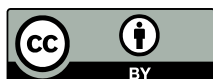

© 2016 by the authors; licensee MDPI, Basel, Switzerland. This article is an open access article distributed under the terms and conditions of the Creative Commons by Attribution (CC-BY) license (<http://creativecommons.org/licenses/by/4.0/>).
